# Supplementary material
Source: PubMed Central journal article supplement (PMC11099826)
Supplement: NIHMS1985812-supplement-Appendix_1.pdf [file NIHMS1985812-supplement-Appendix_1.pdf]

## Appendix 1. Select Codes with Descriptions

| Description                      | ICD-9 Code                                              | CPT Code                            | DRG Code                                                                                                                                                    |
|----------------------------------|---------------------------------------------------------|-------------------------------------|-------------------------------------------------------------------------------------------------------------------------------------------------------------|
| Outcome of Delivery*             | V27                                                     |                                     |                                                                                                                                                             |
| Mode of Delivery ± complication* | 650 (normal delivery)                                   | 59409, 59612<br>(vaginal delivery)  | Version 24 or earlier: 370<br>Version 25 or later: 765<br>(complicated cesarean delivery)                                                                   |
|                                  | 669.7 (cesarean delivery without mention of indication) | 59514, 59620<br>(cesarean delivery) | Version 24 or earlier: 371<br>Version 25 or later: 766<br>(uncomplicated cesarean delivery)                                                                 |
|                                  |                                                         |                                     | Version 24 or earlier: 372<br>Version 25 or later: 774<br>(complicated vaginal delivery)                                                                    |
|                                  |                                                         |                                     | Version 24 or earlier: 373<br>Version 25 or later: 775<br>(uncomplicated vaginal delivery)                                                                  |
|                                  |                                                         |                                     | Version 24 or earlier: 374<br>Version 25 or later: 767<br>(uncomplicated vaginal delivery with sterilization and/or dilation & curettage)                   |
|                                  |                                                         |                                     | Version 24 or earlier: 375<br>Version 25 or later: 768<br>(vaginal delivery with operation room procedure except sterilization and/or dilation & curettage) |

|                                       |                                                                                        |                                |  |
|---------------------------------------|----------------------------------------------------------------------------------------|--------------------------------|--|
| Selected delivery related procedures* | 72.0, 72.1, 72.21, 72.29, 72.31, 72.39, 72.4, 72.6 (forceps)                           |                                |  |
|                                       | 72.51-72.54 (breech extraction)                                                        |                                |  |
|                                       | 72.71-72.79 (vacuum extraction)                                                        |                                |  |
|                                       | 72.8, 72.9, (other specified and unspecified delivery)                                 |                                |  |
|                                       | 73.22 (internal and combined version and extraction)                                   |                                |  |
|                                       | 73.59 (other manually assisted delivery)                                               |                                |  |
|                                       | 73.6 (episiotomy)                                                                      |                                |  |
|                                       | 74.0-74.2, 74.4, 74.99 (cesarean delivery)                                             |                                |  |
| Multiple Gestation                    | 651.0, V27.2-V27.4, and V91.0 (twin)                                                   |                                |  |
|                                       | 651.1 and V91.1 (triplets)                                                             |                                |  |
|                                       | 651.2, 651.9, V27.5-V27.7, V91.2 and V91.9 (higher order or other multiple gestations) |                                |  |
| ART Codes                             |                                                                                        | 58970 (oocyte retrieval)       |  |
|                                       |                                                                                        | 58974, 58976 (embryo transfer) |  |
| Tobacco use                           | 305.1, 649.0, V15.82                                                                   | 99406, 99407                   |  |

|                                                                                                         |                                                             |                                        |                                                                   |
|---------------------------------------------------------------------------------------------------------|-------------------------------------------------------------|----------------------------------------|-------------------------------------------------------------------|
| Pregestational diabetes                                                                                 | 250-250.93, 648.00-648.04                                   |                                        |                                                                   |
| Chronic hypertension                                                                                    | 401.0, 401.1, 401.9, 402.00-405.99, 642.0, 642.1, 642.2     |                                        |                                                                   |
| Preexisting renal disease                                                                               | 250.4, 403, 404, 405.01, 405.11, 405.91, 585.1-585.6, 585.9 |                                        |                                                                   |
| Cardiovascular disease                                                                                  | 412, 414.0, 414.8, 414.9, 429.2                             |                                        |                                                                   |
| Obesity                                                                                                 | 649.1, 278.00, 278.01, 278.03                               |                                        |                                                                   |
| Prior cesarean delivery                                                                                 | 654.2                                                       |                                        |                                                                   |
| Molar Pregnancy <sup>Error!</sup><br>Bookmark not defined.                                              | 630                                                         |                                        |                                                                   |
| Spontaneous abortion or Termination <sup>Error!</sup><br>Bookmark not defined.                          | 631, 632, 634-638, 69.01, 69.51, 74.91, 75.0                | 59840, 59841, 59850-59852, 59855-59857 | Version 24 or earlier: 380, 381<br>Version 25 and later: 770, 779 |
| Ectopic pregnancy <sup>Error!</sup> Bookmark not defined.                                               | 633                                                         |                                        | Version 24 or earlier: 378<br>Version 25 or later: 777            |
| Complication following an abortion, ectopic, or molar pregnancy <sup>Error!</sup> Bookmark not defined. | 639                                                         |                                        |                                                                   |

ICD-9, International Classification of Diseases, 9th Revision, Clinical Modification; CPT Current Procedural Terminology; DRG, Diagnosis Related Group; ART, assisted reproductive technology.

\* Inclusion criteria

**Error! Bookmark not defined.** Exclusion criteria
