# Supplementary material
Source: PubMed Central journal article supplement (PMC11099826)
Supplement: NIHMS1985812-supplement-Appendix_2.pdf [file NIHMS1985812-supplement-Appendix_2.pdf]

## Appendix 2. ICD-9 and CPT codes for Severe Maternal Morbidity

| Severe Maternal Morbidity Indicator                  | ICD-9-CM Diagnosis Codes                                              | ICD-9-CM Procedure Code | CPT Codes                                                                               |
|------------------------------------------------------|-----------------------------------------------------------------------|-------------------------|-----------------------------------------------------------------------------------------|
| 1. Acute myocardial infarction                       | 410.xx                                                                |                         | 92920-92944                                                                             |
| 2. Acute renal failure                               | 584, 669.3                                                            |                         |                                                                                         |
| 3. Adult respiratory distress syndrome               | 518.5, 518.81, 518.82, 518.84, 799.1                                  |                         |                                                                                         |
| 4. Amniotic fluid embolism                           | 673.1                                                                 |                         |                                                                                         |
| 5. Aneurysm                                          | 441.x                                                                 |                         | 33860-33864, 33870, 33875, 33877, 33880-33891, 34800-34826, 34830-34832                 |
| 6. Cardiac arrest/ventricular fibrillation           | 427.41, 427.42, 427.5                                                 |                         | 92950, 32160                                                                            |
| 7. Disseminated intravascular coagulation            | 286.6, 286.9, 666.3                                                   |                         |                                                                                         |
| 8. Eclampsia                                         | 642.6x                                                                |                         |                                                                                         |
| 9. Heart failure during procedure or surgery         | 669.4x, 997.1                                                         |                         |                                                                                         |
| 10. Internal injuries of thorax, abdomen, and pelvis | 860.xx—869.xx                                                         |                         | 32200, 32035-32036, 32096-32160, 32551                                                  |
| 11. Intracranial injuries                            | 800.xx, 801.xx, 803.xx, 804.xx, 851.xx-854.xx                         |                         | 6100-61070, 61105-61253, 61304-61576, 61580-61619, 6200-62148, 62160-62165, 62180-62258 |
| 12. Puerperal cerebrovascular disorders              | 430, 431, 432.x, 433.x, 434.x, 436, 437.x, 671.5, 674.0, 997.2, 999.2 |                         | 61623-61642<br>61680-61711                                                              |
| 13. Pulmonary edema                                  | 428.1, 518.4                                                          |                         | 32554-32557                                                                             |
| 14. Severe anesthesia complications                  | 668.0, 668.1, 668.2                                                   |                         |                                                                                         |
| 15. Sepsis                                           | 038.0-038.9, 995.91, 995.92                                           |                         |                                                                                         |
| 16. Shock                                            | 669.1, 785.5x, 995.0, 995.4, 998.0                                    |                         |                                                                                         |
| 17. Sickle cell anemia with crisis                   | 282.62, 282.64, 282.69                                                |                         |                                                                                         |

|                                         |                                    |                            |                                                                                                                              |
|-----------------------------------------|------------------------------------|----------------------------|------------------------------------------------------------------------------------------------------------------------------|
| 18. Thrombotic embolism                 | 415.1x, 673.0, 673.2, 673.3, 673.8 |                            | 33910, 33915, 34001, 34051, 34101, 34111, 34151, 34201, 34203                                                                |
| 19. Blood transfusion                   |                                    | 99.00-99.09                | 36430, 36455, V58.2                                                                                                          |
| 20. Cardio monitoring                   |                                    | 89.6x                      | 93503                                                                                                                        |
| 21. Conversion of cardiac rhythm        |                                    | 99.6x                      | 92953 92960, 92961, 92970, 92971                                                                                             |
| 22. Hysterectomy                        |                                    | 68.3-68.9                  | 51925, 58150, 58180, 58200, 58210, 58260, 58262, 58263, 58290-58292, 58293, 58270, 58294, 58275, 58280, 59525                |
| 23. Operations on heart and pericardium |                                    | 35.xx, 36.xx, 37.xx, 39.xx | 33572, 33641-33697<br>33702-33722, 33724-33732<br>33735-33768, 33800-33853<br>33910-33926, 33930-33945<br>33960-33993, 33999 |
| 24. Temporary tracheostomy              |                                    | 31.1                       |                                                                                                                              |
| 25. Mechanical ventilation              |                                    | 93.90, 96.01-96.05, 96.7x  | 31500, 94002-94005, 94660, 99504                                                                                             |

ICD-9, International Classification of Diseases, 9th Revision, Clinical Modification; CPT Current Procedural Terminology.
