# Supplementary material
Source: PubMed Central journal article supplement (PMC11099826)
Supplement: NIHMS1985812-supplement-Appendix_3.pdf [file NIHMS1985812-supplement-Appendix_3.pdf]

**Appendix 3. Supplemental Tables 1 and 2.**

**Supplemental Table 1. Number and Rate of Severe Maternal Morbidity per 10,000 Deliveries by ART status, Separated for Delivery and Postpartum Readmission among Singleton Gestations.**

| <b>Delivery</b>   |                |                      |            |                      |           |
|-------------------|----------------|----------------------|------------|----------------------|-----------|
|                   | <b>Non-ART</b> |                      | <b>ART</b> |                      |           |
|                   | <b>N</b>       | <b>Rate (95% CI)</b> | <b>N</b>   | <b>Rate (95% CI)</b> | <b>P*</b> |
| 2008              | 1,674          | 99 (95-104)          | 50         | 348 (265-456)        | <.0001    |
| 2009              | 2,196          | 113 (108-117)        | 54         | 282 (216-366)        | <.0001    |
| 2010              | 1,790          | 102 (97-107)         | 50         | 228 (173-300)        | <.0001    |
| 2011              | 2,615          | 119 (115-124)        | 56         | 235 (181-304)        | <.0001    |
| 2012              | 2,610          | 118 (113-122)        | 48         | 198 (150-262)        | .0009     |
| 2008-2012         | 10,885         | 111 (109-113)        | 258        | 249 (221-281)        | <.0001    |
| <b>Postpartum</b> |                |                      |            |                      |           |
| 2008              | 263            | 16 (14-18)           | 3          | 21 (7-65)            | .496      |
| 2009              | 345            | 18 (16-20)           | 4          | 21 (8-55)            | .587      |
| 2010              | 291            | 17 (15-19)           | 6          | 27 (12-61)           | .187      |
| 2011              | 363            | 17 (15-18)           | 11         | 46 (26-83)           | .003      |
| 2012              | 391            | 18 (16-20)           | 5          | 21 (9-50)            | .624      |
| 2008-2012         | 1,653          | 17 (16-18)           | 29         | 28 (20-40)           | .011      |

ART, assisted reproductive technology; CI, confidence interval.

\* Holm-Bonferroni corrected  $p \leq .0001$  denotes statistical significance of Pearson Chi-squared and Fisher exact tests.

**Supplemental Table 2. Number and Rate of Severe Maternal Morbidity per 10,000 Deliveries by ART status, Separated for Delivery and Postpartum Readmission among Multiple Gestations.**

| <b>Delivery</b>   |                |                      |            |                      |           |
|-------------------|----------------|----------------------|------------|----------------------|-----------|
|                   | <b>Non-ART</b> |                      | <b>ART</b> |                      |           |
|                   | <b>N</b>       | <b>Rate (95% CI)</b> | <b>N</b>   | <b>Rate (95% CI)</b> | <b>P*</b> |
| 2008              | 191            | 518 (451-594)        | 46         | 688 (519-906)        | .078      |
| 2009              | 224            | 520 (457-590)        | 45         | 513 (385-680)        | 1.0       |
| 2010              | 183            | 465 (404-536)        | 43         | 486 (362-649)        | .792      |
| 2011              | 239            | 484 (428-548)        | 57         | 554 (430-712)        | .344      |
| 2012              | 258            | 520 (462-586)        | 57         | 602 (467-773)        | .305      |
| 2008-2012         | 1,095          | 502 (474-532)        | 248        | 563 (499-635)        | .099      |
| <b>Postpartum</b> |                |                      |            |                      |           |
| 2008              | 16             | 43 (27-71)           | 6          | 90 (40-198)          | .134      |
| 2009              | 20             | 46 (30-72)           | 3          | 34 (11-106)          | .785      |
| 2010              | 18             | 46 (29-73)           | 7          | 79 (38-165)          | .202      |
| 2011              | 20             | 41 (26-63)           | 6          | 58 (26-129)          | .434      |
| 2012              | 21             | 42 (28-65)           | 2          | 21 (5-84)            | .566      |
| 2008-2012         | 95             | 44 (36-53)           | 24         | 54 (37-81)           | .325      |

ART, assisted reproductive technology; CI, confidence interval.

\* Holm-Bonferroni corrected  $p \leq .0001$  denotes statistical significance of Pearson Chi-squared and Fisher exact tests.
